# Supplementary material for: Redundant and Diversified Roles Among Selected Arabidopsis thaliana EXO70 Paralogs During Biotic Stress Responses
Source: PubMed Central journal article supplement (PMC7333677; doi:10.3389/fpls.2020.00960), 2020-06-26
Supplement: DataSheet_1.pdf [file DataSheet_1.pdf]

**Supplementary figure 2.** Hierarchical clustering of EXO70 isoforms according to expression levels upon fungal and oomycete treatments.

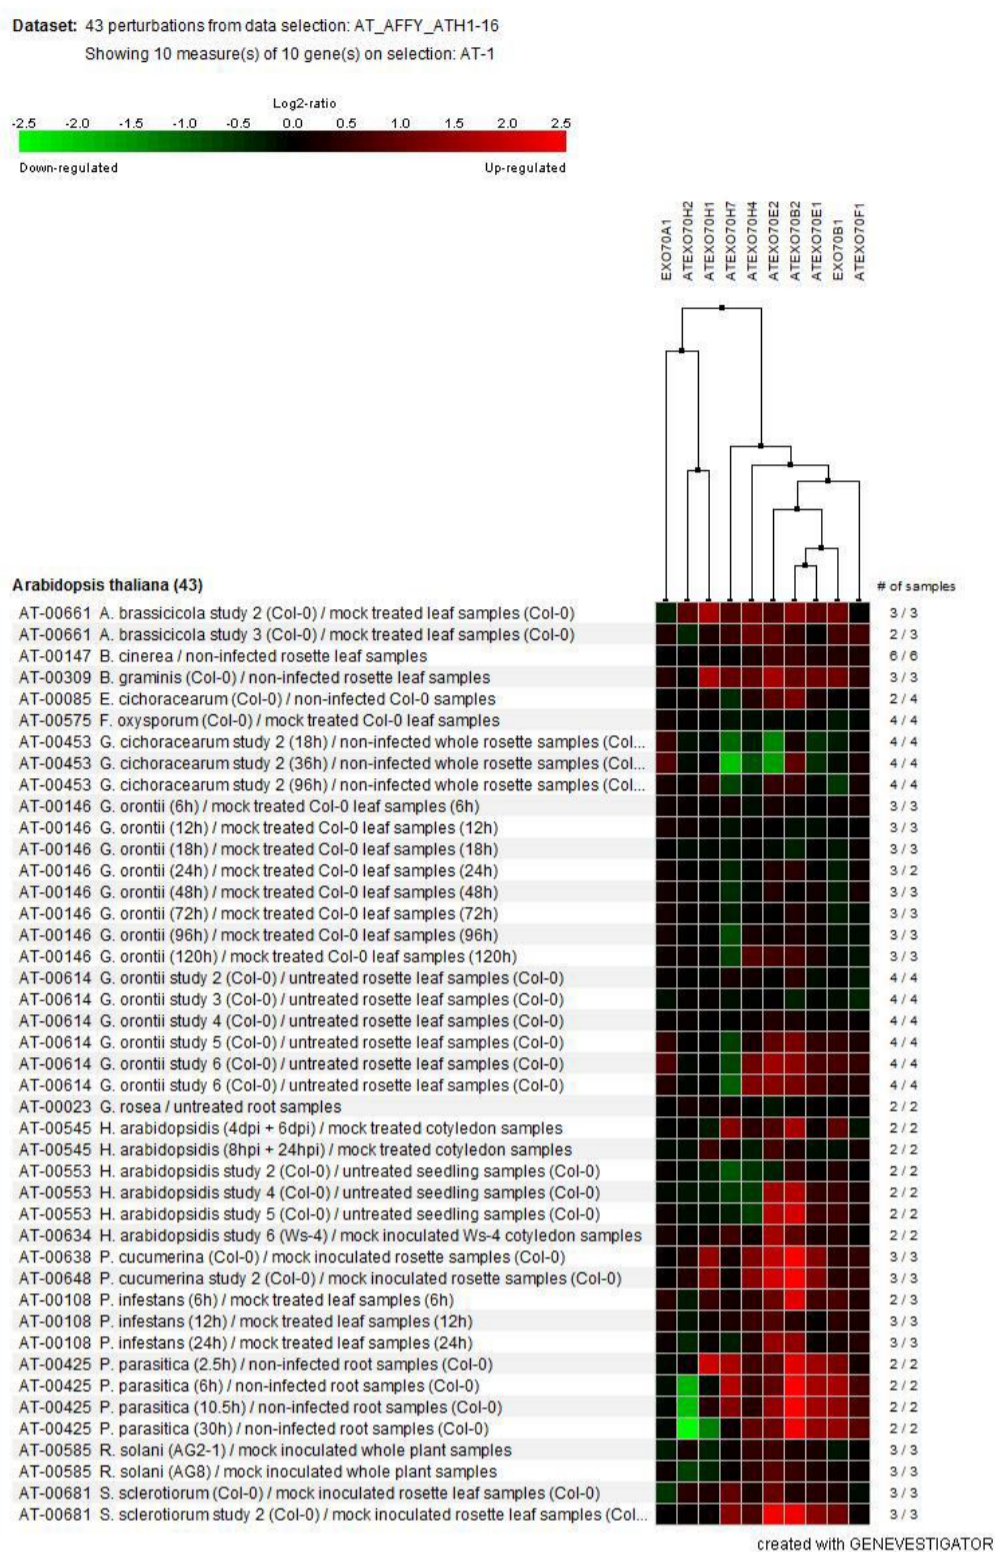

**Supplementary figure 3.** Absolute root hair lengths of mock treated seedlings for analyzed single and multiple mutant lines.

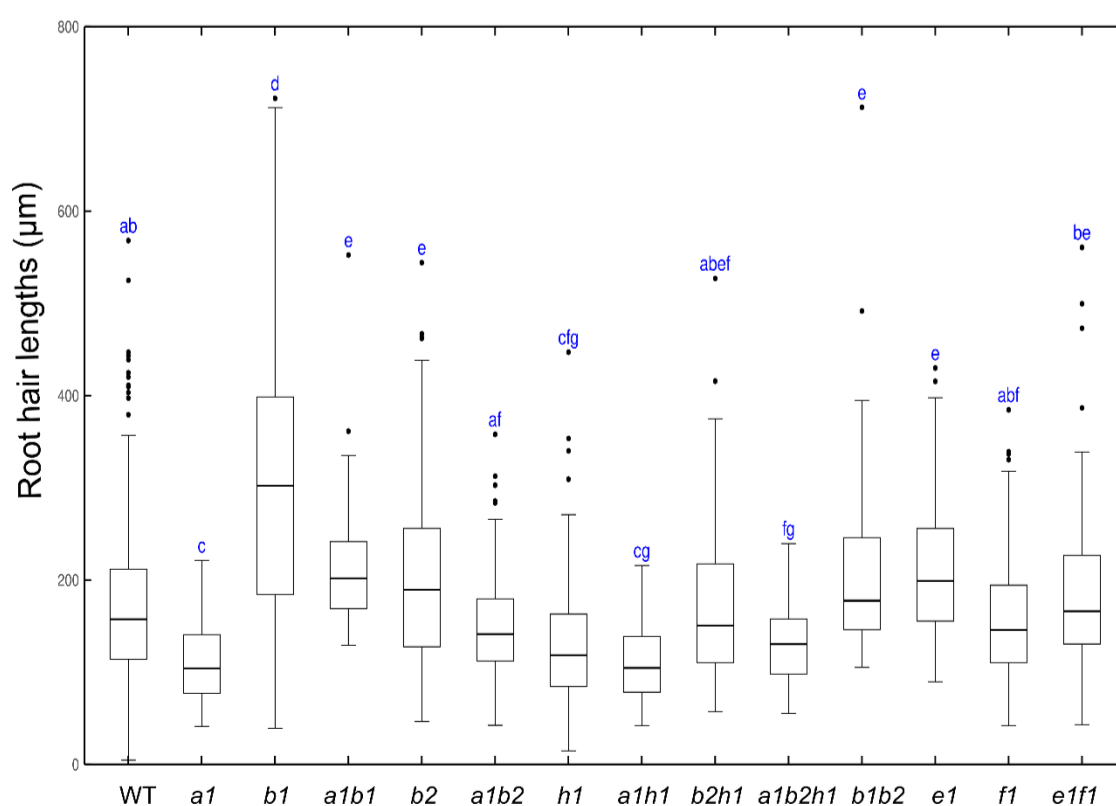



**Supplementary figure 4.** (A) Coomassie stained gels with aliquots of GST-fused EXO70B1 and B2 C termini as well as free GST (upper row); PIP/GST as negative and PIP/GRIP protein (Echelon, Israel) as positive strip controls (lower row). (B) Ponceau stained membranes and anti-HA (Sigma) detection of *in vitro* translated HA-tagged EXO70B1, B2 and H1 (4x more amount used for incubation with strips); comparison of the strength of signal detected on PIP strips for EXO70B1 and B2 when equal amount of proteins and exposure times for signal detection were used.

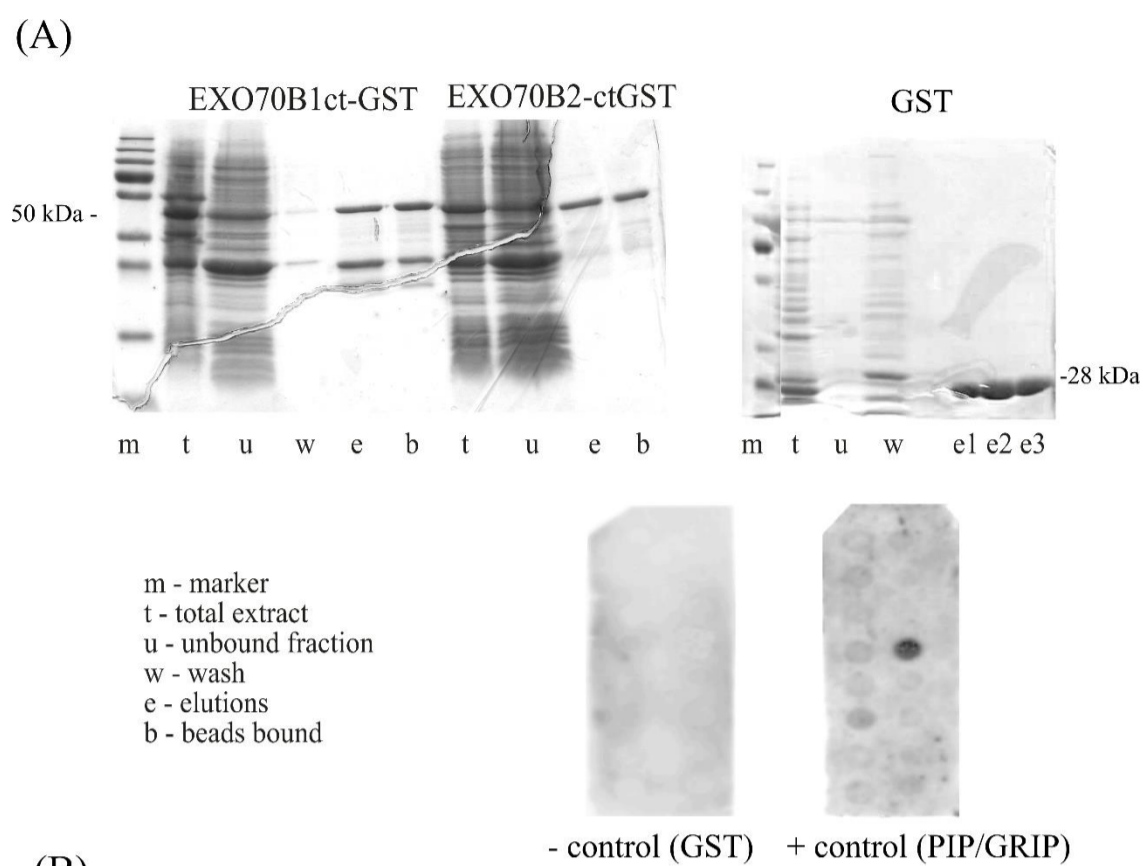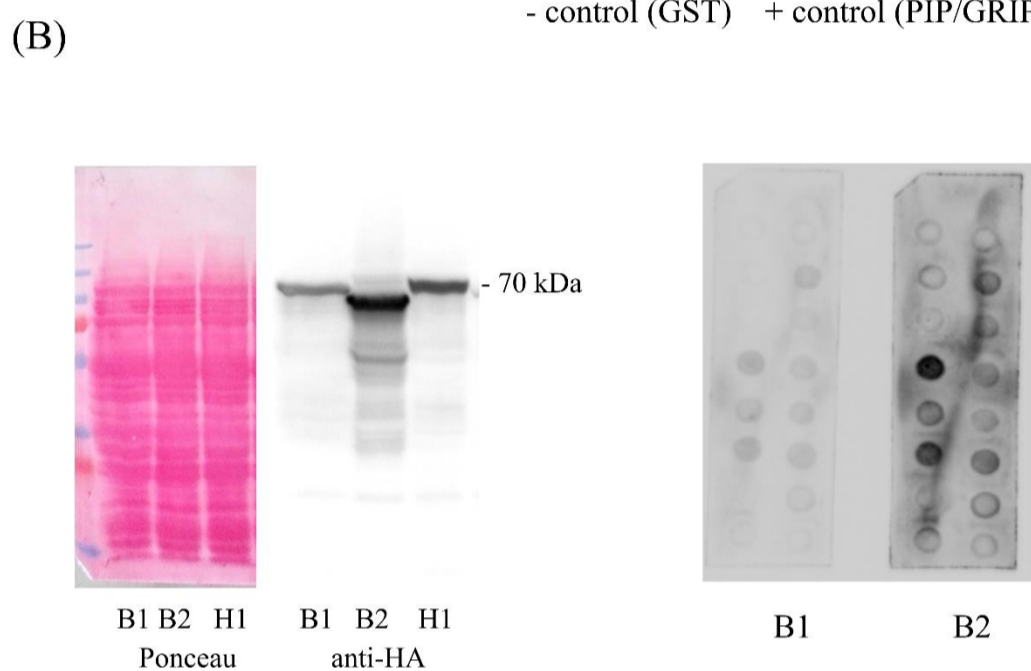

**Supplementary table 1.** Primers used for cloning and genotyping.

| Purpose                            | Forward primer <sup>1</sup>                                  | Reverse primer <sup>1</sup>            |
|------------------------------------|--------------------------------------------------------------|----------------------------------------|
| GST-EXO70B1-ct (EcoRI-SalI)        | <u>aagaattct</u> cctaaagattcaactctggtgactg                   | aagg <u>tcgact</u> cattttgttcccgtgg    |
| GST-EXO70B2-ct (EcoRI-XhoI)        | aagaatt <u>cggat</u> cagatacagagaccggtg                      | aaact <u>cgagt</u> caacttgagctttcctt   |
| HA-EXO70B1                         | gatgttccagattacgctatggcggagaatggtg                           | atag <u>cgccgct</u> cattttcttcccgtggt  |
| HA-EXO70B2                         | gatgttccagattacgctatggctgaagccggt                            | atag <u>cgccgct</u> caacttgagctttccttg |
| HA-EXO70H1                         | gatgttccagattacgctatggcgaaaatggcga                           | atag <u>cgccgct</u> cagcctgaaacacacc   |
| pTNT-HA-overhang_SalI <sup>2</sup> | aag <u>tcgacg</u> ccgccaccatgtaccatacagatggtccagattacgctatg  |                                        |
| pTNT-HA-overhang_XhoI <sup>3</sup> | ata <u>ctcgagg</u> ccgccaccatgtaccatacagatggtccagattacgctatg |                                        |
| <i>exo70E1</i>                     | ctgatgatggttcttcaaatagctatgg                                 | acagaggttatggagtagaaatgtcc             |

<sup>1</sup> All primer sequences are presented in 5' to 3' direction. Introduced restriction sites are underlined.

<sup>2</sup>Used for B1,H1 SalI-NotI cloning. <sup>3</sup>Used for B2 XhoI-NotI cloning.

**Supplementary table 2.** Sample sizes (n) used for analyzes in biotic stress assays. For mock and bacteria treated root hairs (RH) total numbers of root hairs and in parenthesis numbers of seedlings analyzed are presented (ca 20 root hairs per seedling). For flooding experiments numbers of analyzed samples (each sample is pool of 3-4 seedlings) are presented.

|                      | <b>n for mock treated RH</b> | <b>n for bacteria treated RH</b> | <b>n for hrpH-flooding</b> |
|----------------------|------------------------------|----------------------------------|----------------------------|
| <b>WT</b>            | 407 (20)                     | 303 (15)                         | 36                         |
| <b><i>a1</i></b>     | 120 (6)                      | 160 (8)                          | 18                         |
| <b><i>b1</i></b>     | 80 (4)                       | 80 (4)                           | 18                         |
| <b><i>alb1</i></b>   | 80 (4)                       | 80 (4)                           | 12                         |
| <b><i>b2</i></b>     | 160 (8)                      | 160 (8)                          | 18                         |
| <b><i>alb2</i></b>   | 123 (6)                      | 103 (5)                          | 12                         |
| <b><i>h1</i></b>     | 120 (6)                      | 100 (5)                          | 18                         |
| <b><i>alh1</i></b>   | 60 (3)                       | 120 (6)                          | 12                         |
| <b><i>b2h1</i></b>   | 80 (4)                       | 80 (4)                           | 12                         |
| <b><i>alb2h1</i></b> | 80 (4)                       | 80 (4)                           | 10                         |
| <b><i>b1b2</i></b>   | 100 (5)                      | 100 (5)                          | 12                         |
| <b><i>e1</i></b>     | 135 (7)                      | 116 (6)                          | 6                          |
| <b><i>f1</i></b>     | 152 (5)                      | 119 (6)                          | 6                          |
| <b><i>e1f1</i></b>   | 120 (6)                      | 120 (6)                          | 6                          |
